# Supplementary material for: Synthesis of Bi2Sn2O7 and enhanced photocatalytic activity of Bi2Sn2O7 hybridized with C3N4
Source: Royal Society of Chemistry journal article supplement (doi:10.1039/c5nj00886g), 2015-01-01
Supplement: c5nj00886g1.pdf [file c5nj00886g1.pdf]

## Supporting Information

Synthesis of  $\text{Bi}_2\text{Sn}_2\text{O}_7$  and enhanced photocatalytic activity of

$\text{Bi}_2\text{Sn}_2\text{O}_7$  hybridized with  $\text{C}_3\text{N}_4$

Di Li,\* and Juanqin Xue

School of Metallurgical Engineering, Xi'an University of Architecture and  
Technology, Xi'an, 710055, China

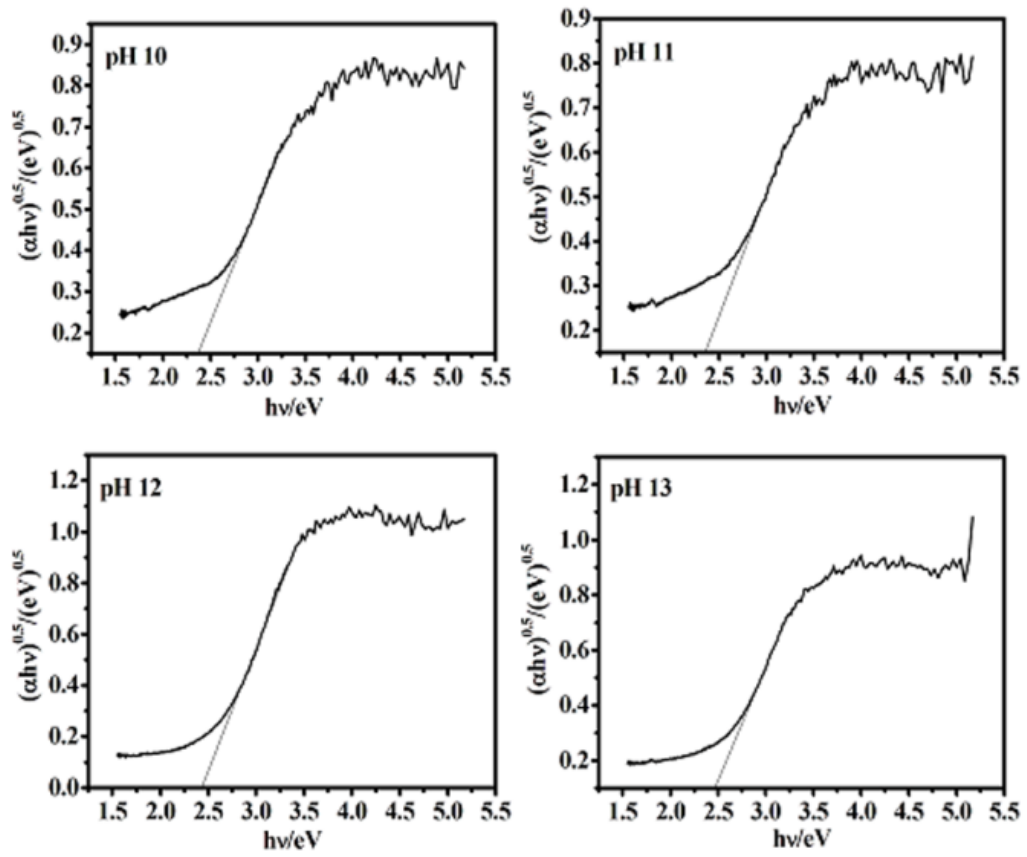

Fig. 1. The plots of  $(\alpha h\nu)^2$  vs. photon energy ( $h\nu$ ).

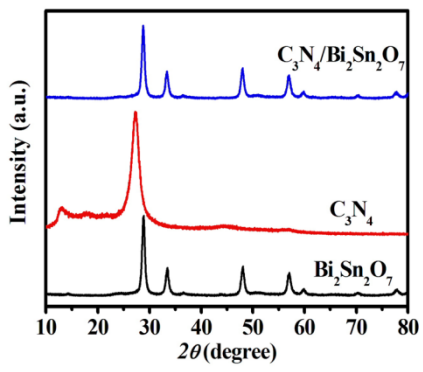

Fig. 2. XRD pattern of  $Bi_2Sn_2O_7$ ,  $C_3N_4$  and  $C_3N_4/Bi_2Sn_2O_7$  (12%).

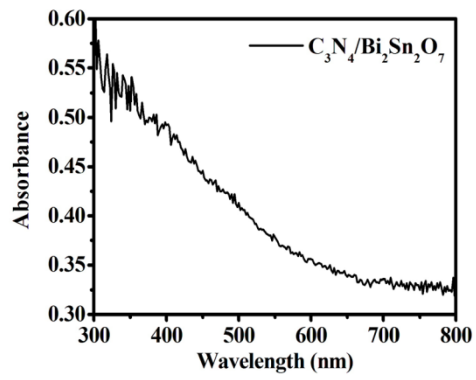

Fig. 3. The typical UV-vis DRS of  $C_3N_4/Bi_2Sn_2O_7$  (12%).

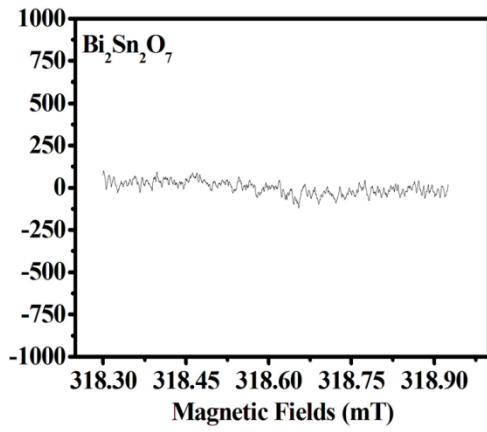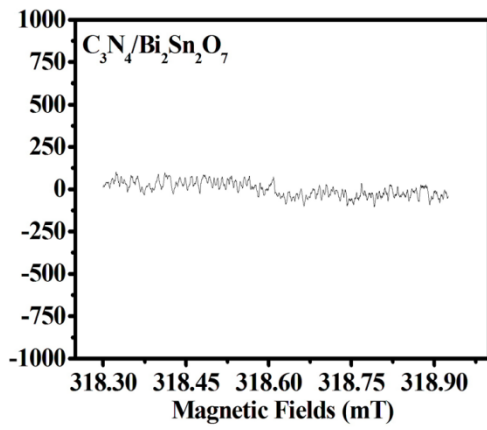

Fig. 4. EPR spectra of  $\text{Bi}_2\text{Sn}_2\text{O}_7$  and  $\text{C}_3\text{N}_4/\text{Bi}_2\text{Sn}_2\text{O}_7$  (12%) photocatalysts in water.

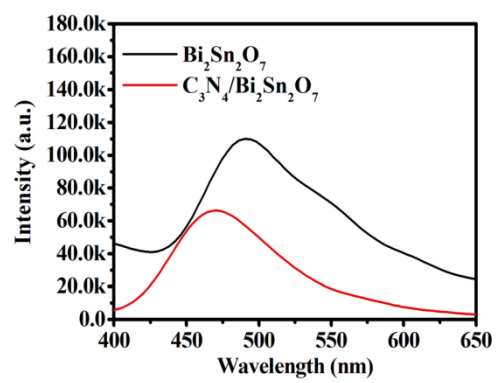

Fig. 5. Photoluminescence spectra of  $\text{Bi}_2\text{Sn}_2\text{O}_7$  and  $\text{C}_3\text{N}_4/\text{Bi}_2\text{Sn}_2\text{O}_7$  (8%).
